# Supplementary material for: No evidence of critical slowing down in two endangered Hawaiian honeycreepers
Source: PubMed Central journal article supplement (PMC5683562; doi:10.1371/journal.pone.0187518), 2017-11-13
Supplement: pone.0187518.s002.pdf [file pone.0187518.s002.pdf]

S1 Table. Kendall’s  $\tau$  and linear trends of the early warning signals autocorrelation, sample variance, and linear skewness in the Hawai‘i Creeper and Hawai‘i `Ākepa using detection-corrected abundance estimates in Hakalau.

| EWS metric                                                      | Kendall’s $\tau$ | Slope  | 95% CI          | SE    | T-value | P-value | Res. df | Assessment of slopes                                                                               |
|-----------------------------------------------------------------|------------------|--------|-----------------|-------|---------|---------|---------|----------------------------------------------------------------------------------------------------|
| <b>Hawai‘i Creeper: 50% rolling window (1999-2012)</b>          |                  |        |                 |       |         |         |         |                                                                                                    |
| Autocorrelation                                                 | 0.604            | 0.021  | 0.013 – 0.027   | 0.004 | 5.88    | 0.0001  | 12      | Autocorrelation slope is positive; Variance and L-Skewness slope confidence intervals bracket zero |
| Variance                                                        | -0.538           | -0.005 | -0.012 – 0.002  | 0.004 | -1.31   | 0.21    | 12      |                                                                                                    |
| L-Skewness                                                      | 0.552            | 0.007  | -0.022 – 0.037  | 0.015 | 0.510   | 0.62    | 12      |                                                                                                    |
| <b>Hawai‘i Creeper : 25% rolling window (1992-2012)</b>         |                  |        |                 |       |         |         |         |                                                                                                    |
| Autocorrelation                                                 | 0.152            | 0.015  | -0.025 – 0.055  | 0.021 | 0.75    | 0.46    | 19      | No trend; confidence intervals of all slopes bracket zero                                          |
| Variance                                                        | -0.514           | -0.003 | -0.016 – 0.011  | 0.007 | -0.40   | 0.69    | 19      |                                                                                                    |
| L-Skewness                                                      | 0.058            | -0.014 | -0.043 – 0.015  | 0.015 | -0.94   | 0.36    | 19      |                                                                                                    |
| <b>Hawai‘i Creeper: Pre-2000 25% rolling window (1992-2000)</b> |                  |        |                 |       |         |         |         |                                                                                                    |
| Autocorrelation                                                 | 0                | 0.003  | -0.042 – 0.048  | 0.023 | 0.14    | 0.89    | 7       | No trend; confidence intervals of all slopes bracket zero                                          |
| Variance                                                        | 0.444            | 0.009  | -0.012 – 0.030  | 0.011 | 0.86    | 0.42    | 7       |                                                                                                    |
| L-Skewness                                                      | -0.029           | -0.008 | -0.058 – 0.043  | 0.026 | -0.30   | 0.78    | 7       |                                                                                                    |
| <b>Hawai‘i `Ākepa: 50% rolling window (1999-2012)</b>           |                  |        |                 |       |         |         |         |                                                                                                    |
| Autocorrelation                                                 | -0.275           | -0.020 | -0.078 – 0.038  | 0.030 | -0.68   | 0.51    | 12      | L-Skewness slope is negative; Autocorrelation and Variance slope confidence intervals bracket zero |
| Variance                                                        | 0.516            | 0.006  | -0.001 – 0.014  | 0.004 | 1.60    | 0.14    | 12      |                                                                                                    |
| L-Skewness                                                      | -0.692           | -0.027 | -0.048 – -0.006 | 0.011 | -2.49   | 0.03    | 12      |                                                                                                    |
| <b>Hawai‘i `Ākepa: 25% rolling window (1992-2012)</b>           |                  |        |                 |       |         |         |         |                                                                                                    |
| Autocorrelation                                                 | -0.067           | 0.004  | -0.023 – 0.031  | 0.014 | 0.28    | 0.79    | 19      | L-Skewness slope is negative; Autocorrelation and Variance slope confidence intervals bracket zero |
| Variance                                                        | 0.276            | 0.002  | -0.020 – 0.023  | 0.011 | 0.18    | 0.86    | 19      |                                                                                                    |
| L-Skewness                                                      | -0.692           | -0.039 | -0.069 – -0.009 | 0.015 | -2.52   | 0.02    | 19      |                                                                                                    |
| <b>Hawai‘i `Ākepa: Pre-2000 25% rolling window (1992-2000)</b>  |                  |        |                 |       |         |         |         |                                                                                                    |
| Autocorrelation                                                 | -0.278           | -0.020 | -0.107 – 0.068  | 0.045 | -0.44   | 0.67    | 7       | No trend; confidence intervals of all slopes bracket zero                                          |
| Variance                                                        | -0.222           | 0.0003 | -0.007 – 0.007  | 0.004 | 0.07    | 0.95    | 7       |                                                                                                    |
| L-Skewness                                                      | 0.222            | -0.098 | -0.366 – 0.170  | 0.137 | -0.71   | 0.50    | 7       |                                                                                                    |
