# Supplementary material for: No evidence of critical slowing down in two endangered Hawaiian honeycreepers
Source: PubMed Central journal article supplement (PMC5683562; doi:10.1371/journal.pone.0187518), 2017-11-13
Supplement: pone.0187518.s003.pdf [file pone.0187518.s003.pdf]

Rozek et al.  
 No evidence of critical slowing down in two endangered Hawaiian honeycreepers

S2 Table. Estimated break-points and piecewise regression slope estimates for the Hawai'i Creeper and Hawai'i 'Ākepa. Break-points are shown with the corresponding posterior probability ( $P$ ) of a change-point at that time.

| Species, 'package': break-point year    | Change-point $P$ | Slope Estimate | Lower 95% CI | Upper 95% CI | Bracket threshold? | Interpretation        |
|-----------------------------------------|------------------|----------------|--------------|--------------|--------------------|-----------------------|
| Hawai'i Creeper, 'segmented': 2002      | 2%               |                |              |              |                    | Very weak support     |
| before, 1987-2002                       |                  | 0.0310         | 0.0288       | 0.0332       | No                 | Increasing            |
| after, 2002-2012                        |                  | 0.0109         | 0.0065       | 0.0154       | Yes                | Negligible/Increasing |
| Hawai'i Creeper, 'strucchange': 1999    | 44%              |                |              |              |                    | Weak support          |
| before, 1987-1999                       |                  | 0.0295         | 0.0258       | 0.0332       | No                 | Increasing            |
| after 1999-2012                         |                  | 0.0120         | 0.0093       | 0.0148       | Yes                | Negligible/Increasing |
| Hawai'i 'Ākepa, 'segmented': 1996       | 9%               |                |              |              |                    | Very weak support     |
| before, 1987-1996                       |                  | 0.0351         | 0.0153       | 0.0550       | No                 | Increasing            |
| after, 1996-2012                        |                  | -0.0137        | -0.0234      | -0.0038      | Yes                | Negligible/Declining  |
| Japanese White-eye, 'segmented': 1995   | 2%               |                |              |              |                    | Very weak support     |
| before, 1987-1995                       |                  | -0.0233        | -0.0460      | -0.0053      | Yes                | Negligible/declining  |
| after, 1995-2012                        |                  | 0.0555         | 0.0468       | 0.0642       | No                 | Increasing            |
| Japanese White-eye, 'strucchange': 1999 | 78%              |                |              |              |                    | Strong support        |
| before, 1987-1999                       |                  | -0.0093        | -0.0216      | 0.0029       | Yes                | Negligible/declining  |
| after, 1999-2012                        |                  | 0.0550         | 0.0426       | 0.0674       | No                 | Increasing            |
