# Supplementary material for: No evidence of critical slowing down in two endangered Hawaiian honeycreepers
Source: PubMed Central journal article supplement (PMC5683562; doi:10.1371/journal.pone.0187518), 2017-11-13
Supplement: pone.0187518.s004.pdf [file pone.0187518.s004.pdf]

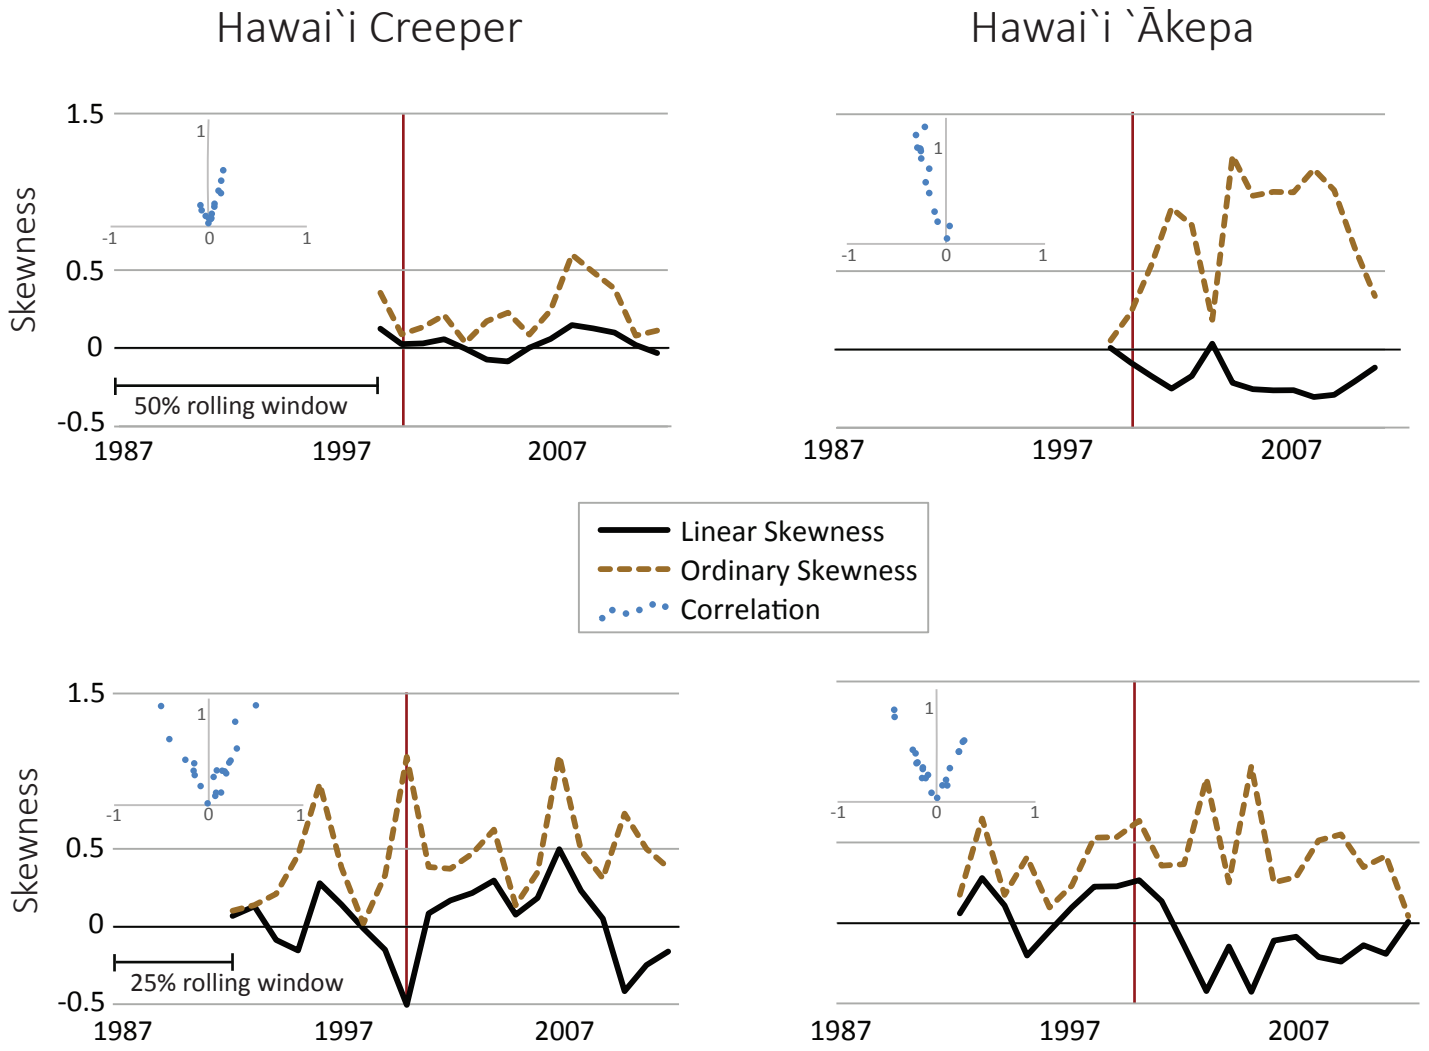

S1 Fig. Linear skewness (black solid line) and ordinary skewness (brown dashed line) with two rolling window sizes (50% top graphs, 25% bottom graphs) for the Hawai'i Creeper and the Hawai'i 'Ākepa. The vertical red line occurs at the year 2000, when the

Japanese White-eye population increased and the purported start of both species' population declines. Inset graphs (blue dots) depict the relationship between values of linear and ordinary skewness; abscissa is L-skewness and the ordinate is the skewness.
